# Supplementary material
Source: PubMed Central journal article supplement (PMC3950835)
Supplement: NIHMS552900-supplement-01.pdf [file NIHMS552900-supplement-01.pdf]

**Molecular Cell, Volume 52**

**Supplemental Information**

**Tsix RNA and the Germline Factor, PRDM14, Link X Reactivation and Stem Cell Reprogramming**

Bernhard Payer, Michael Rosenberg, Masashi Yamaji, Yukihiro Yabuta, Michiyo Koyanagi-Aoi,  
Katsuhiko Hayashi, Shinya Yamanaka, Mitinori Saitou, and Jeannie T. Lee

## SUPPLEMENTAL FIGURES

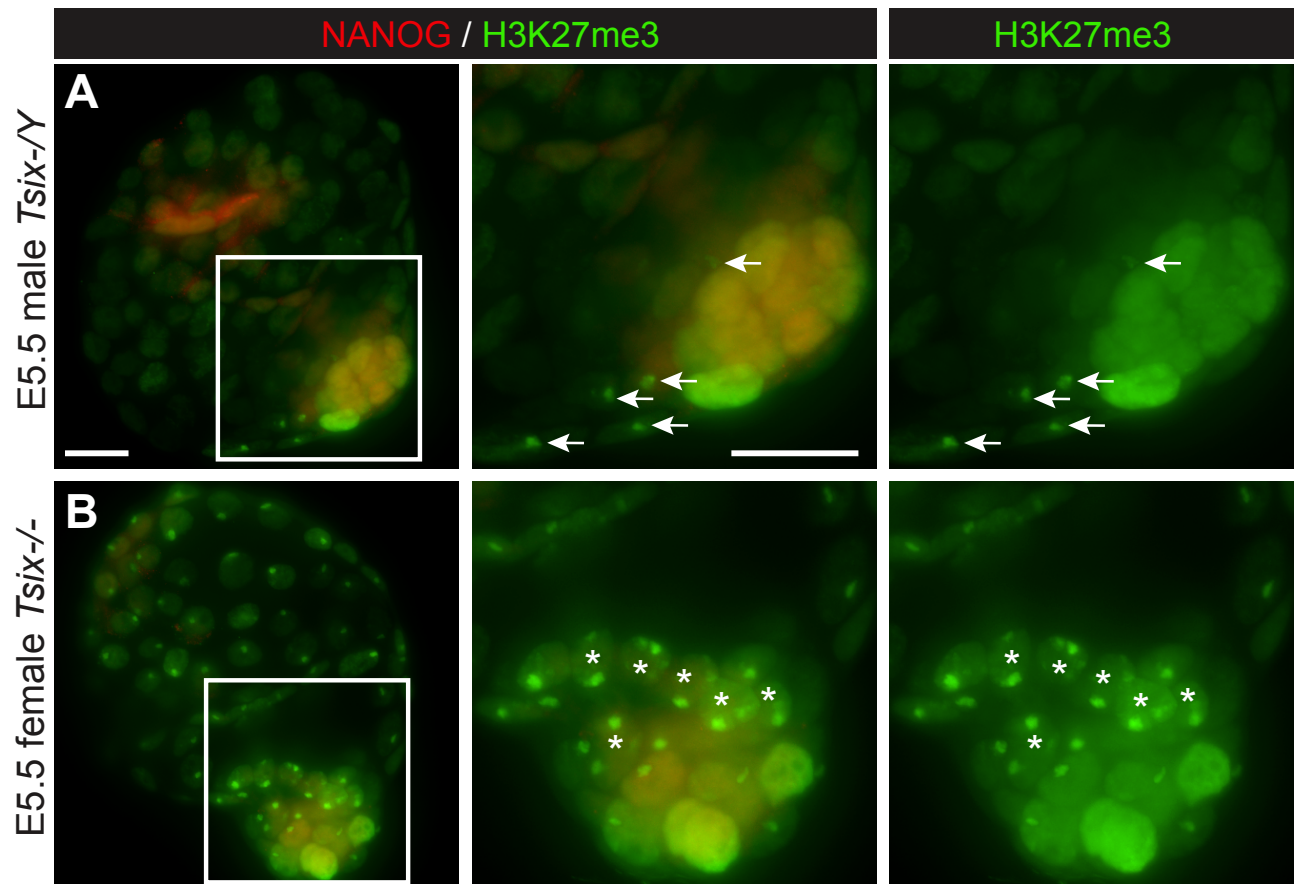

**Figure S1, related to Figure 1. Ectopic XCI in *Tsix*-mutant E5.5 diapause embryos**

(A) Male *Tsix*<sup>-/-</sup> embryo displaying H3K27me3(green)-positive spots (arrows) suggesting ectopic XCI in some NANOG(red)-negative cells. The boxed ICM region is shown in a close-up in the middle and right panel. Projection of z-series (full embryo). Scale bars = 20  $\mu$ m

(B) Female *Tsix*<sup>-/-</sup> embryo with two H3K27me3-spots in several extraembryonic cells (stars, PE and/or TE cells). Projection of 20  $\mu$ m thick z-stack (partial embryo).

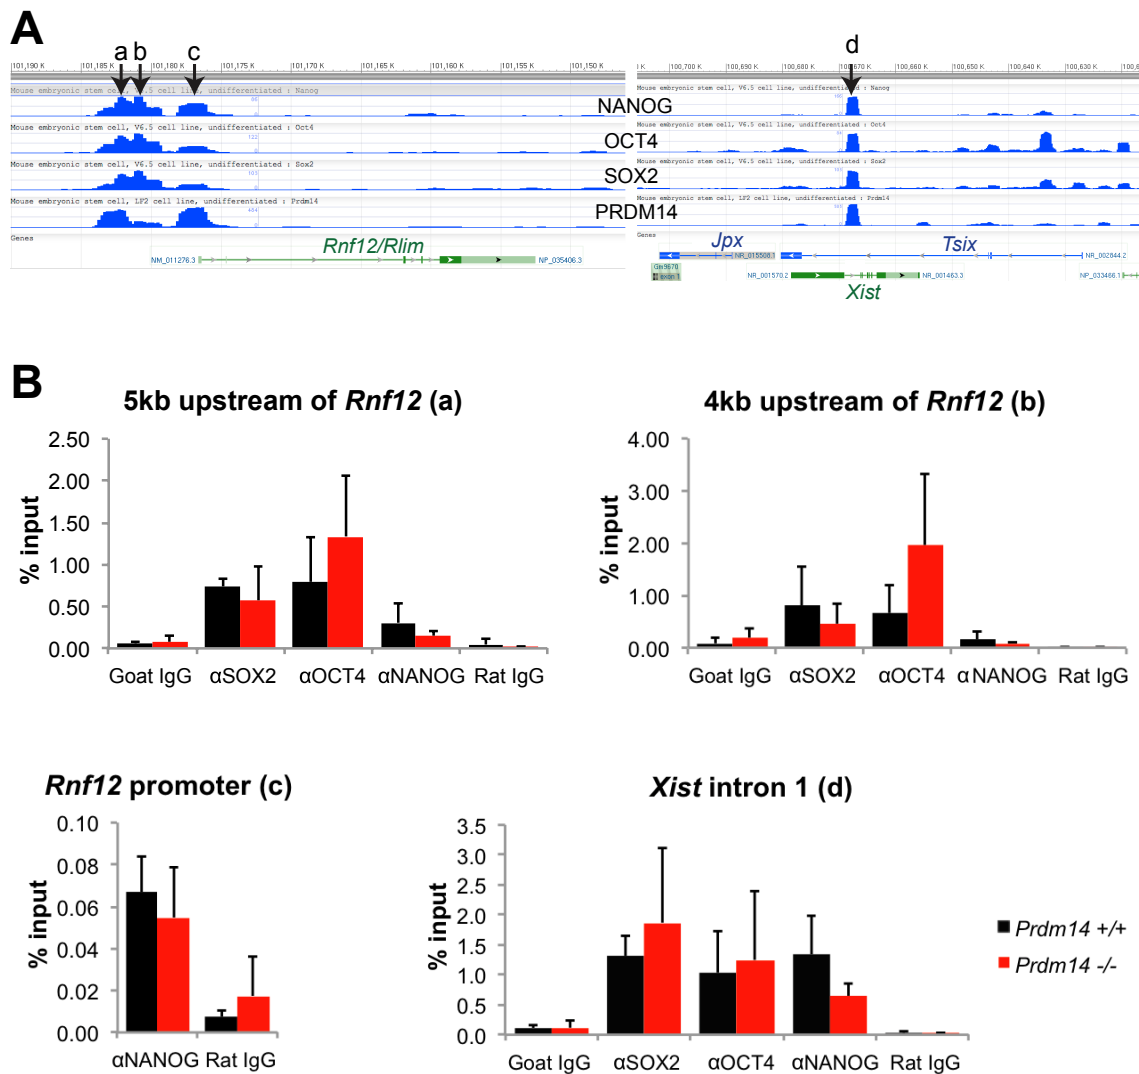

**Figure S2, related to Figure 7. Pluripotency factor binding across the *Rnf12* locus and the *Jpx/Xist/Tsix* region**

(A) ChIP-seq data (also shown in Figure 7B) for binding of NANOG, OCT4, SOX2 (Marson et al., 2008) and PRDM14 (Ma et al., 2010) along the *Xic*, retrieved via the NCBI epigenomics database. Arrows indicate binding sites assayed in (B).

(B) ChIP-qPCR for pluripotency factor binding 5' of *Rnf12* (a, b, c) and at *Xist* intron 1 (d) in undifferentiated *Prdm14*<sup>+/+</sup> (black) and *Prdm14*<sup>-/-</sup> (red) ESCs. Error bars = SD. Goat IgG = negative control for  $\alpha$ OCT4 and  $\alpha$ SOX2. Rat IgG = negative control for  $\alpha$ NANOG.

**A**

|                      |        | Xic loci     |                         |                         |                                |             |
|----------------------|--------|--------------|-------------------------|-------------------------|--------------------------------|-------------|
|                      |        | <i>Rnf12</i> | <i>Xist</i><br>promoter | <i>Xist</i><br>intron 1 | <i>DXPas34/</i><br><i>Tsix</i> | <i>Xite</i> |
| Pluripotency factors | OCT4   |              | —                       |                         |                                |             |
|                      | SOX2   |              | —                       |                         | —                              |             |
|                      | KLF4   |              | —                       | —                       |                                |             |
|                      | NANOG  |              | —                       |                         | —                              | —           |
|                      | C-MYC  | —            | —                       | —                       |                                | —           |
|                      | REX1   | —            |                         | —                       |                                | —           |
|                      | PRDM14 |              | —                       |                         | —                              | —           |

**B**

X-reactivation in WT embryos / iPSC

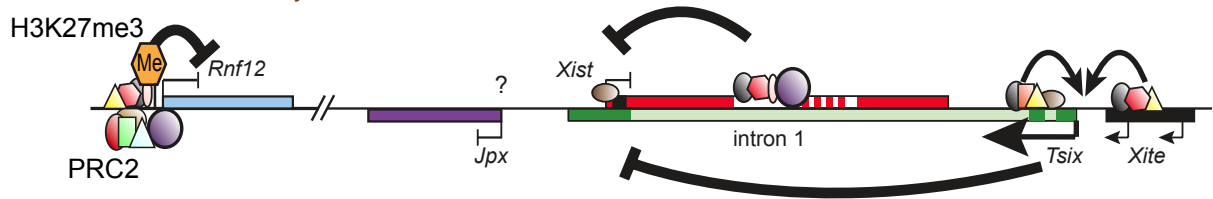**C**X-reactivation in *Tsix*<sup>-/-</sup> embryos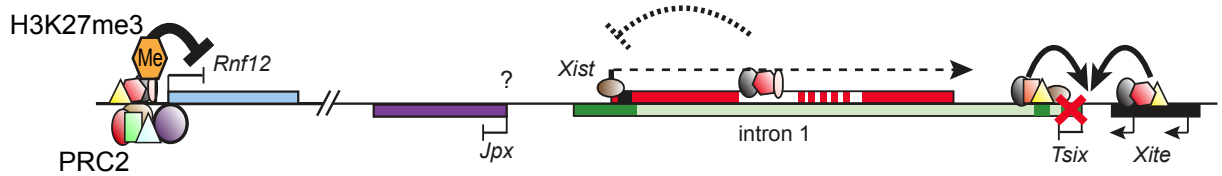**D**X-reactivation in *Prdm14*<sup>-/-</sup> embryos / iPSC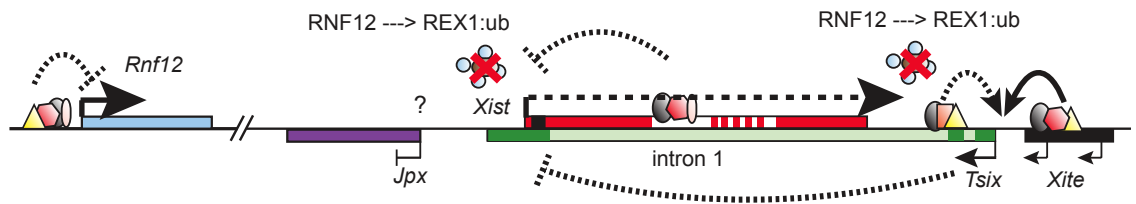**E**

X-inactivation

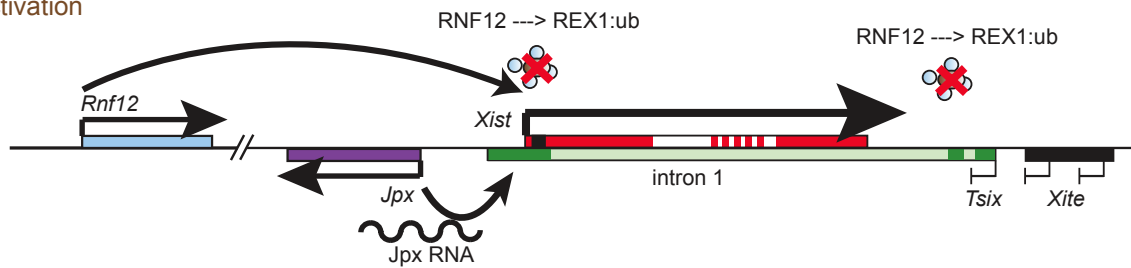

**Figure S3, related to Figure 7. Extended model for molecular mechanisms of XCR**

(A, B) XCR and XCI are controlled by multiple mechanisms. The master regulator *Xist* is the target of opposing factors. Several pluripotency factors bind to regulatory regions of *Rnf12*, *Xist* and *Tsix*, where they act either as activators or repressors. One of those factors is PRDM14, which acts repressively by binding to *Xist* intron1 and by recruiting PRC2 to *Rnf12*, which PRC2 silences through establishing H3K27 tri-methylation. *Tsix*, which is activated by pluripotency factors, in turn represses *Xist*, at least in part by recruiting PRDM14 to *Xist* intron 1. In addition to these repressive forces, the lack of the expression of *Xist*-activators RNF12 and Jpx contribute to the *Xist* “off” state during XCR. The question mark indicates that nothing is known about the regulation of *Jpx*.

(C) In the absence of *Tsix*, PRDM14 dissociates from *Xist* intron 1. During XCR in blastocysts, *Xist*-repression is thereby delayed. However, in *Tsix*<sup>-/-</sup> mutant pluripotent stem cells, *Xist* is not upregulated due to the lack of RNF12 and Jpx and by repression through other pluripotency factors.

(D) In *Prdm14*-mutant cells/embryos, *Rnf12* gets de-repressed and its protein ubiquitinates REX1, another *Xist* and *Tsix* regulator, resulting in REX1 degradation. Due to other repressive pluripotency factors this is not sufficient to lead to upregulation of *Xist* in *Prdm14*<sup>-/-</sup> ESCs. However, in *Prdm14*<sup>-/-</sup> blastocysts and during iPSC reprogramming this leads to a reduced XCR-efficiency.

(E) In cells before or after XCR, the lack of pluripotency factor-driven repressive mechanisms and the expression of the *Xist* activators RNF12 and Jpx lead to full upregulation of *Xist*.

## SUPPLEMENTAL EXPERIMENTAL PROCEDURES

### Expression analysis by qPCR

ESC and iPSC RNA was isolated and DNase I-treated using RNeasy Mini kit (Qiagen). RNA was then reverse transcribed with Oligo(dT)<sub>15</sub> primers (Promega) and Superscript III reverse transcriptase (Invitrogen). QPCR on cDNA of at least three biological replicates each for *Prdm14*<sup>+/+</sup> and *Prdm14*<sup>-/-</sup> ESCs was performed on an Bio-Rad iCycler using iQ SYBR Green Supermix (Bio-Rad). Ct values were normalized to Gapdh in order to calculate expression changes (Pfaffl, 2001).

### Stable transfection of ESCs

2x10<sup>7</sup> EL 16.7 and *Tsix*<sup>Stop<sup>TST</sup></sup> (Ogawa et al., 2008) mouse ESCs were electroporated with 30 mg of linearized pCAGGS plasmid vector containing recombinant PRDM14 fused to C-terminal Flag and Hemagglutinin tags (PRDM14-FH) (Yamaji et al., 2013), in PBS using GenePulser II (Bio-Rad) as described (Anguera et al., 2011). Cells were selected using media supplemented with 1µg/ml Puromycin (Gibco). PRDM14-FH expression was confirmed by Western Blot using anti-HA tag antibody (Sigma, H-6908).

### Chromatin immunoprecipitation

EL 16.7, *Tsix*-Stop, *Prdm14*<sup>+/+</sup> or *Prdm14*<sup>-/-</sup> mouse ESCs were trypsinized and cross-linked with 1.1% formaldehyde. 5x10<sup>6</sup> cells were subjected to chromatin immunoprecipitation as described previously (Jeon and Lee, 2011) using specific antibodies (see below). Enrichment was quantified using a Bio-Rad iCycler.

**List of antibodies used for immunostainings**

| <b>Antibody</b>                                                                     | <b>Dilution</b> |
|-------------------------------------------------------------------------------------|-----------------|
| Alexa Fluor 488/555/647 secondary antibodies (Invitrogen)                           | 1:500           |
| goat anti-GATA4 (Santa Cruz, sc-1237))                                              | 1:50            |
| mouse anti-H3K27me3 (Abcam, ab6002)                                                 | 1:100           |
| rabbit anti-NANOG (Novus Biologicals, NB100-588)                                    | 1:750           |
| rat anti-NANOG (eBioscience, 14-5761)                                               | 1:200           |
| mouse anti-SSEA1 (Developmental Studies Hybridoma Bank, University of Iowa, MC-480) | 1:200           |

### Primer list for quantitative RT-PCR

| Target              | Primers         | Primer Sequence                   |
|---------------------|-----------------|-----------------------------------|
| Dnmt3b <sup>1</sup> | Dnmt3bBP1F      | CTC GCA AGG TGT GGG CTT TTG TAA C |
|                     | Dnmt3bBP1R      | CTG GGC ATC TGT CAT CTT TGC ACC   |
| Dnmt3l <sup>1</sup> | Dnmt3lBP1F      | CCA GGG CAG ATT TCT TCC TAA GGT C |
|                     | Dnmt3lBP1R      | TGA GCT GCA CAG AGG CAT CC        |
| Gapdh <sup>1</sup>  | GapdhBP1F       | ATG AAT ACG GCT ACA GCA ACA GG    |
|                     | GapdhBP1R       | CTC TTG CTC AGT GTC CTT GCT G     |
| Gata6 <sup>1</sup>  | Gata6BP1F       | CAC AGT CCC CGT TCT TTT ACT G     |
|                     | Gata6BP1R       | GTG GTA CAG GCG TCA AGA GTG       |
| Jpx <sup>2</sup>    | Jpx76+          | TTA GCC AGG CAG CTA GAG GA        |
|                     | Jpx255-         | AGC CGT ATT CCT CCA TGG TT        |
| Nanog <sup>1</sup>  | NanogBP1F       | CTT TCA CCT ATT AAG GTG CTT GC    |
|                     | NanogBP1R       | TGG CAT CGG TTC ATC ATG GTA C     |
| Oct4 <sup>1</sup>   | Oct4BP1F        | GAT GCT GTG AGC CAA GGC AAG       |
|                     | Oct4BP1R        | GGC TCC TGA TCA ACA GCA TCA C     |
| Rnf12 <sup>3</sup>  | Rnf12 ex4-5 for | GGT CCA CCA CCA CAG AGC           |
|                     | Rnf12 ex4-5 rev | TGA CCA CTT CTT GTT GTA TTT CC    |
| Sox2 <sup>1</sup>   | Sox2BP1F        | CAT GAG AGC AAG TAC TGG CAA G     |
|                     | Sox2BP1R        | CCA ACG ATA TCA ACC TGC ATG G     |
| Tsix <sup>4</sup>   | TsixBP6F        | TGG GTC ATT GGC ATC TTA GTC       |
|                     | TsixBP6R        | CCC AGG GTG TCT GAT CTC TT        |
| Xist <sup>5</sup>   | XistBP2F        | CCC GCT GCT GAG TGT TTG ATA TG    |
|                     | XistBP2R        | CAG AGT AGC GAG GAC TTG AAG AG    |

The primer sequences have been previously described in <sup>1</sup>(Kurimoto et al., 2006), <sup>2</sup>(Sun et al., 2013), <sup>3</sup>(Barakat et al., 2011), <sup>4</sup>(Sugimoto et al., 2007) and <sup>5</sup>(Shibata and Lee, 2003).

**List of antibodies used for ChIP experiments**

| <b>Antibody</b>                                                                       | <b>Isotype Control</b>                | <b>Amount per Reaction (mg)</b> |
|---------------------------------------------------------------------------------------|---------------------------------------|---------------------------------|
| Anti-Histone H3K27me3 rabbit polyclonal (Active Motif, cat# 19155)                    | Rabbit IgG (Abcam, ab46540)           | 5                               |
| Anti-Sox2 (Y-17) goat polyclonal antibody (Santa Cruz, sc-17320)                      | Normal goat IgG (Santa Cruz, sc-2028) | 5                               |
| Anti-Oct3/4 (N-19) goat polyclonal antibody (Santa Cruz, sc-8628)                     | Normal goat IgG (Santa Cruz, sc-2028) | 5                               |
| Anti-Mouse Nanog clone eBioMLC-51 rat monoclonal antibody (eBioscience, cat# 14-5761) | Rat IgG2A (Abcam, ab18450)            | 2.5                             |

### Primer list for genomic loci tested on ChIP experiments

| Amplicon                                  | Primers           | Primer Sequence                     |
|-------------------------------------------|-------------------|-------------------------------------|
| <i>β-actin</i> promoter <sup>1</sup>      | b_actin_prom_F    | CCG TTC CGA AAG TTG CCT T           |
|                                           | b_actin_prom_R    | CGC CGC CGG GTT TTA TA              |
| 5' <i>Rnf12</i>                           | RNF12_P14_3F      | AGC GCC AGC TCG GAG ACG TA          |
|                                           | RNF12_P14_3R      | GGC CTG TGA AGC TGG GAG CG          |
| 4kb upstream to <i>Rnf12</i> <sup>1</sup> | RNF12_4kb_F       | CAG CCT CTG GCT CTA CCA GT          |
|                                           | RNF12_4kb_R       | GTG ACC TGC TGG GGA GAA TA          |
| 5kb upstream to <i>Rnf12</i> <sup>1</sup> | RNF12_5kb_F       | GCC TGT CAA ACG TCC TGT TTA         |
|                                           | RNF12_5kb_R       | GGA GGT TGT GGG AGA AAC AA          |
| H3K27me3 upstream to <i>Rnf12</i>         | RNF12_K27_F       | CTC CCA AAT GAC CCT TCC CC          |
|                                           | RNF12_K27_R       | TGA GAG GAC TGC AAG AAG GC          |
| <i>Xist</i> Intron 1 <sup>2</sup>         | XIn1_F            | AAC CCT TTT AAG TCC ACT GTA AAT TCC |
|                                           | XIn1_R            | TAG AGA GCC AGA CAA TGC TAA GCC     |
| <i>Xist</i> Intron 1 (Mus-specific)       | Xin1_ASP_F        | CTA GAG AGC CAG ACA ATG CT          |
|                                           | Xin1_ASP_R2 (Mus) | TTT TGC ATT TGC CTT TTG AA          |
| <i>Xist</i> Intron 1 (Cas-specific)       | Xin1_ASP_F3       | AAA TGT TTC CTT TTG AAG CA          |
|                                           | Xin1_ASP_R1 (Cas) | TTT TGC ATT TGC CTT TTG AT          |

<sup>1</sup> Primer sequences for regions 4 kb and 5 kb upstream to *Rnf12* transcription start site as well as control non-binding *β-actin* promoter region were adopted from (Navarro et al., 2011).

<sup>2</sup> *Xist* intron 1 primer pair was described in (Navarro et al., 2008).

## SUPPLEMENTAL REFERENCES

Anguera, M.C., Ma, W., Clift, D., Namekawa, S., Kelleher, R.J., 3rd, and Lee, J.T. (2011). Tsx produces a long noncoding RNA and has general functions in the germline, stem cells, and brain. *PLoS Genet* 7, e1002248.

Jeon, Y., and Lee, J.T. (2011). YY1 tethers Xist RNA to the inactive X nucleation center. *Cell* 146, 119-133.

Kurimoto, K., Yabuta, Y., Ohinata, Y., Ono, Y., Uno, K.D., Yamada, R.G., Ueda, H.R., and Saitou, M. (2006). An improved single-cell cDNA amplification method for efficient high-density oligonucleotide microarray analysis. *Nucleic Acids Res* 34, e42.

Navarro, P., Moffat, M., Mullin, N.P., and Chambers, I. (2011). The X-inactivation trans-activator Rnf12 is negatively regulated by pluripotency factors in embryonic stem cells. *Hum Genet* 130, 255-264.

Pfaffl, M.W. (2001). A new mathematical model for relative quantification in real-time RT-PCR. *Nucleic Acids Res* 29, e45.

Shibata, S., and Lee, J.T. (2003). Characterization and quantitation of differential Tsix transcripts: implications for Tsix function. *Hum Mol Genet* 12, 125-136.
